# Supplementary material
Source: publisher figshare collection journal article supplement (https://sage.figshare.com/ndownloader/files/17722463)
Supplement: Supplementary file 1 [file 17722463]

## Appendix A

### Search Terms and Strategy (PubMed)

| Key Search Terms       | Search Strategy                                                                                                                                                                                                                                                                                                                                                                                                                                                                                                                                                                                                                                                                                                                                                                                                                                                     |
|------------------------|---------------------------------------------------------------------------------------------------------------------------------------------------------------------------------------------------------------------------------------------------------------------------------------------------------------------------------------------------------------------------------------------------------------------------------------------------------------------------------------------------------------------------------------------------------------------------------------------------------------------------------------------------------------------------------------------------------------------------------------------------------------------------------------------------------------------------------------------------------------------|
| Child and young person | child OR child* OR adolescent OR adolesc* OR juvenile* OR pediatric OR pediatric* OR paediatric* OR teen* OR youth* OR young* OR girl* OR boy OR boys                                                                                                                                                                                                                                                                                                                                                                                                                                                                                                                                                                                                                                                                                                               |
| Type 1 diabetes        | AND<br>type 1 diabetes OR iddm OR t1dm OR t1d OR 'type 1 diabetic' OR 'juvenile onset diabetes' OR 'juvenile diabetes' OR 'early onset diabetes' OR 'autoimmune diabetes' OR 'auto immune diabetes' OR insulin depend* OR insulindepend* OR absolute insulin deficien* OR 'paediatric diabetes' OR 'pediatric diabetes' OR 'childhood diabetes' OR type i diabetes OR 'type one diabetes'                                                                                                                                                                                                                                                                                                                                                                                                                                                                           |
| Self-management        | AND<br>'Self Care'[Mesh] OR 'Self Efficacy'[Mesh] OR self manag* OR self care OR self efficac* OR self treat* OR self direct* OR self help* OR self monitor* OR 'Consumer Participation'[Mesh] OR 'Personal Autonomy'[Mesh] OR 'Decision Making'[Mesh] OR decision mak* OR patient participat* OR autonomy OR autonomous OR responsibilit* OR 'Health Behavior'[Mesh] OR adherence OR 'Life Change Events'[Mesh] OR 'Adaptation, Psychological'[Mesh] OR empower* OR 'Power (Psychology)'[Mesh] OR 'Attitude to Health'[Mesh] OR 'Emotional Adjustment'[Mesh] OR health attitude* OR patient involv* OR psychological adaptation* OR psychological adjust* OR behavioural adaptation* OR behavioral adaptation* OR behavioural adjust* OR behavioral adjust*                                                                                                        |
| Qualitative            | AND<br>'Qualitative Research'[Mesh] OR 'Nursing Methodology Research'[Mesh] OR 'Interviews as Topic'[Mesh] OR qualitative OR interview* OR theme* OR thematic OR grounded theor* OR phenomenol* OR ethnograph* OR ethnolog* OR emic OR etic) OR hermeneutic* OR heuristic* OR semiotic* OR data saturat* OR participant observ* OR experienc* OR purposive sampl* OR cluster sampl* OR 'Focus Groups'[Mesh] OR focus group* OR observational method* OR content analys* OR constant compar* OR key informant* OR theoretical sampl* OR theoretical saturat* OR discourse analys* OR discursive* OR discuss* OR narrativ* OR narration* OR ethnomethodolog* OR mixed method* OR mixed model* OR mixed design* OR multiple method* OR multimethod* OR conversation analys* OR triangulat* OR 'Attitude'[Mesh]) OR attitud* OR opinion* OR perspectiv* OR experiential |

## Appendix B

### *Quality appraisal of included studies*

| Author (year)                    | Clear statement of aims | Qualitative methodology appropriate | Appropriate research design | Appropriate recruitment strategy | Appropriate data collection method | Researcher and participant relationship considered | Consideration of ethical issues | Rigorous data analysis | Clear statement of findings | Valuable research |
|----------------------------------|-------------------------|-------------------------------------|-----------------------------|----------------------------------|------------------------------------|----------------------------------------------------|---------------------------------|------------------------|-----------------------------|-------------------|
| Babler & Strickland (2016)       | Yes                     | Yes                                 | Yes                         | Can't tell                       | Yes                                | No                                                 | Yes                             | Yes                    | Yes                         | Yes               |
| Babler & Strickland (2015a)      | Yes                     | Yes                                 | Yes                         | Can't tell                       | Yes                                | No                                                 | Yes                             | Yes                    | Yes                         | Yes               |
| Babler & Strickland (2015b)      | Yes                     | Yes                                 | Yes                         | Can't tell                       | Yes                                | No                                                 | Yes                             | Yes                    | Yes                         | Yes               |
| Boman et al. (2015)              | Yes                     | Yes                                 | Yes                         | Yes                              | Yes                                | Yes                                                | Yes                             | Yes                    | Yes                         | Yes               |
| Burke & Dowling (2007)           | Yes                     | Yes                                 | Yes                         | Can't tell                       | Yes                                | Can't tell                                         | Yes                             | Can't tell             | Yes                         | Yes               |
| Carroll & Marrero (2006)         | Yes                     | Yes                                 | Yes                         | Can't tell                       | Can't tell                         | Can't tell                                         | Yes                             | Can't tell             | Can't tell                  | Can't tell        |
| Chao et al. (2016)               | Yes                     | No                                  | Can't tell                  | Can't tell                       | Can't tell                         | Can't tell                                         | Can't tell                      | Yes                    | Yes                         | Yes               |
| Chilton & Pires-Yfantouda (2015) | Yes                     | Yes                                 | Yes                         | Yes                              | Yes                                | Yes                                                | Yes                             | Yes                    | Yes                         | Yes               |
| Christian et al. (1999)          | Yes                     | Yes                                 | Can't tell                  | Can't tell                       | Yes                                | No                                                 | Can't tell                      | Yes                    | Yes                         | Can't tell        |

| Author (year)               | Clear statement of aims | Qualitative methodology appropriate | Appropriate research design | Appropriate recruitment strategy | Appropriate data collection method | Researcher and participant relationship considered | Consideration of ethical issues | Rigorous data analysis | Clear statement of findings | Valuable research |
|-----------------------------|-------------------------|-------------------------------------|-----------------------------|----------------------------------|------------------------------------|----------------------------------------------------|---------------------------------|------------------------|-----------------------------|-------------------|
| Cosma & Baban (2015)        | Yes                     | Yes                                 | Can't tell                  | Can't tell                       | Yes                                | Can't tell                                         | Can't tell                      | Can't tell             | Yes                         | Yes               |
| Cruz et al. (2018)          | Yes                     | Yes                                 | Can't tell                  | Can't tell                       | Yes                                | No                                                 | Can't tell                      | Can't tell             | Yes                         | Yes               |
| Damaio & Pinto (2007)       | Yes                     | Yes                                 | Yes                         | Yes                              | Yes                                | No                                                 | Yes                             | Yes                    | Yes                         | Yes               |
| Davidson et al. (2004)      | Yes                     | Yes                                 | Can't tell                  | Can't tell                       | Can't tell                         | No                                                 | Can't tell                      | Yes                    | Yes                         | Yes               |
| Dickinson & O'Reilly (2004) | Yes                     | Yes                                 | Yes                         | Can't tell                       | Can't tell                         | Can't tell                                         | Yes                             | Yes                    | Yes                         | Yes               |
| Faro (1999)                 | Yes                     | Yes                                 | Yes                         | Yes                              | Yes                                | No                                                 | Can't tell                      | Yes                    | Can't tell                  | Yes               |
| Hanna & Guthrie (2001)      | Yes                     | Yes                                 | Can't tell                  | Yes                              | Yes                                | Can't tell                                         | Yes                             | Yes                    | Yes                         | Yes               |
| Hanna & Guthrie (2000)      | Yes                     | Yes                                 | Yes                         | Yes                              | Yes                                | Can't tell                                         | Yes                             | Can't tell             | Can't tell                  | Yes               |
| Hermann (2006)              | Yes                     | Yes                                 | Yes                         | Yes                              | Yes                                | Can't tell                                         | Yes                             | Yes                    | Yes                         | Yes               |
| Huus & Enskar (2007)        | Yes                     | Yes                                 | Yes                         | Can't tell                       | Yes                                | No                                                 | Can't tell                      | Can't tell             | Yes                         | Can't tell        |
| Karlsson et al. (2008)      | Yes                     | Yes                                 | Yes                         | Can't tell                       | Yes                                | Yes                                                | Yes                             | Yes                    | Yes                         | Yes               |

| Author (year)            | Clear statement of aims | Qualitative methodology appropriate | Appropriate research design | Appropriate recruitment strategy | Appropriate data collection method | Researcher and participant relationship considered | Consideration of ethical issues | Rigorous data analysis | Clear statement of findings | Valuable research |
|--------------------------|-------------------------|-------------------------------------|-----------------------------|----------------------------------|------------------------------------|----------------------------------------------------|---------------------------------|------------------------|-----------------------------|-------------------|
| Kupper et al., 2018      | Yes                     | Yes                                 | Yes                         | Can't tell                       | Yes                                | Can't tell                                         | Yes                             | Yes                    | Yes                         | Yes               |
| Kyngas & Barlow (1995)   | Yes                     | Yes                                 | Yes                         | Can't tell                       | Yes                                | No                                                 | Yes                             | Yes                    | Yes                         | Yes               |
| Kyngas & Hentinen (1995) | Yes                     | Yes                                 | Yes                         | Can't tell                       | Can't tell                         | Yes                                                | Yes                             | Can't tell             | Yes                         | Yes               |
| Kyngas et al. (1998)     | Yes                     | Yes                                 | Can't tell                  | Can't tell                       | Can't tell                         | Can't tell                                         | Yes                             | No                     | Yes                         | Yes               |
| Leach & Erickson (1988)  | No                      | Can't tell                          | Can't tell                  | Can't tell                       | Yes                                | No                                                 | No                              | Can't tell             | Can't tell                  | Can't tell        |
| Leonard et al. (2005)    | Yes                     | Can't tell                          | Can't tell                  | Yes                              | Yes                                | Yes                                                | Yes                             | Yes                    | Yes                         | Yes               |
| Marshall et al. (2018)   | Yes                     | Yes                                 | Yes                         | Can't tell                       | Yes                                | Can't tell                                         | Can't tell                      | Can't tell             | Yes                         | Yes               |
| Maslakpak et al. (2010)  | Yes                     | Yes                                 | Yes                         | Yes                              | Yes                                | No                                                 | Yes                             | Yes                    | Yes                         | Yes               |
| Meldman (1987)           | Can't tell              | Yes                                 | Yes                         | Can't tell                       | Yes                                | Can't tell                                         | Can't tell                      | Yes                    | Yes                         | Yes               |
| Peters et al. (2014)     | Yes                     | Yes                                 | Yes                         | Can't tell                       | Yes                                | No                                                 | Yes                             | Yes                    | Yes                         | Yes               |
| Rankin et al. (2018)     | Yes                     | Yes                                 | Yes                         | Yes                              | Yes                                | Yes                                                | Yes                             | Yes                    | Yes                         | Yes               |
| Ryninks et al. (2015)    | Yes                     | No                                  | Can't tell                  | Yes                              | Can't tell                         | Yes                                                | Yes                             | Yes                    | Yes                         | Yes               |

| Author (year)                 | Clear statement of aims | Qualitative methodology appropriate | Appropriate research design | Appropriate recruitment strategy | Appropriate data collection method | Researcher and participant relationship considered | Consideration of ethical issues | Rigorous data analysis | Clear statement of findings | Valuable research |
|-------------------------------|-------------------------|-------------------------------------|-----------------------------|----------------------------------|------------------------------------|----------------------------------------------------|---------------------------------|------------------------|-----------------------------|-------------------|
| Serlachius et al. (2012)      | Yes                     | Yes                                 | Yes                         | Yes                              | Yes                                | No                                                 | Yes                             | Can't tell             | Yes                         | Yes               |
| Standiford et al. (1997)      | Yes                     | Yes                                 | Yes                         | Yes                              | Yes                                | Yes                                                | Yes                             | Can't tell             | Yes                         | Yes               |
| Sullivan-Bolyai et al. (2014) | Yes                     | Yes                                 | Yes                         | Can't tell                       | Can't tell                         | Yes                                                | Yes                             | Can't tell             | Yes                         | Yes               |
| Viklund & Wikblad (2009)      | Yes                     | Yes                                 | Yes                         | Yes                              | Can't tell                         | Can't tell                                         | Yes                             | Yes                    | Yes                         | Yes               |
| Wang et al. (2013)            | Yes                     | Yes                                 | Yes                         | Yes                              | Yes                                | Can't tell                                         | Yes                             | Yes                    | Yes                         | Yes               |
| Wang et al. (2010)            | Yes                     | Yes                                 | Yes                         | Can't tell                       | Yes                                | Can't tell                                         | Yes                             | Can't tell             | Yes                         | Yes               |
| Weinger et al. (2001)         | Yes                     | Yes                                 | Yes                         | Can't tell                       | Yes                                | Can't tell                                         | Yes                             | Can't tell             | Yes                         | Yes               |
| Ye et al. (2017)              | Yes                     | Yes                                 | Yes                         | Yes                              | Yes                                | Can't tell                                         | Yes                             | Yes                    | Yes                         | Yes               |

## Appendix C

### *Themes identified in each article by number of extracts coded*

| Analytic themes                                      | Negotiating independence |                                                              |                                        |                                             | Feeling in control                             |                            |                                                       |                                                 | Total number of extracts coded for descriptive theme |
|------------------------------------------------------|--------------------------|--------------------------------------------------------------|----------------------------------------|---------------------------------------------|------------------------------------------------|----------------------------|-------------------------------------------------------|-------------------------------------------------|------------------------------------------------------|
|                                                      | Coming to terms with T1D | Parental roles and parent involvement in T1D self-management | Others' involvement in self-management | Becoming independent in T1D self-management | Structuring self-management into everyday life | Ability to self-manage T1D | Fitting in or standing out and self-management of T1D | Thinking about the future and T1D complications |                                                      |
| (Number of articles descriptive theme is present in) | (32)                     | (33)                                                         | (40)                                   | (31)                                        | (39)                                           | (24)                       | (34)                                                  | (25)                                            |                                                      |
| Babler & Strickland, 2016                            | 42                       | 6                                                            | 7                                      | 11                                          | 37                                             | 24                         | 1                                                     | 3                                               | 131                                                  |
| Babler & Strickland, 2015a                           | 11                       | 4                                                            | 4                                      | 10                                          | 12                                             | 3                          | 3                                                     | 4                                               | 51                                                   |
| Babler & Strickland, 2015b                           | 5                        | 42                                                           | 5                                      | 28                                          | 50                                             | 4                          | 4                                                     | 2                                               | 140                                                  |
| Boman et al., 2015                                   | 5                        | 10                                                           | 48                                     | 7                                           | 24                                             | 8                          | 5                                                     | 4                                               | 111                                                  |
| Burke & Dowling, 2007                                | 6                        | 0                                                            | 16                                     | 0                                           | 13                                             | 0                          | 0                                                     | 0                                               | 35                                                   |
| Carroll & Marrero, 2006                              | 8                        | 39                                                           | 29                                     | 6                                           | 32                                             | 3                          | 1                                                     | 3                                               | 121                                                  |
| Chao et al, 2016                                     | 1                        | 5                                                            | 11                                     | 1                                           | 18                                             | 1                          | 1                                                     | 4                                               | 42                                                   |
| Chilton & Pires-Yfantouda, 2015                      | 26                       | 6                                                            | 13                                     | 13                                          | 31                                             | 6                          | 1                                                     | 6                                               | 102                                                  |
| Christian et al., 1999                               | 1                        | 10                                                           | 18                                     | 15                                          | 13                                             | 5                          | 2                                                     | 1                                               | 65                                                   |
| Cosma &                                              | 16                       | 7                                                            | 18                                     | 5                                           | 28                                             | 3                          | 7                                                     | 4                                               | 88                                                   |

| Analytic themes            | Negotiating independence         |                                                                      |                                                |                                                     | Feeling in control                                     |                                    |                                                               |                                                         | Total number of extracts coded for descriptive theme |
|----------------------------|----------------------------------|----------------------------------------------------------------------|------------------------------------------------|-----------------------------------------------------|--------------------------------------------------------|------------------------------------|---------------------------------------------------------------|---------------------------------------------------------|------------------------------------------------------|
|                            | Coming to terms with T1D<br>(32) | Parental roles and parent involvement in T1D self-management<br>(33) | Others' involvement in self-management<br>(40) | Becoming independent in T1D self-management<br>(31) | Structuring self-management into everyday life<br>(39) | Ability to self-manage T1D<br>(24) | Fitting in or standing out and self-management of T1D<br>(34) | Thinking about the future and T1D complications<br>(25) |                                                      |
| Baban, 2015                |                                  |                                                                      |                                                |                                                     |                                                        |                                    |                                                               |                                                         |                                                      |
| Cruz et al., 2018          | 1                                | 6                                                                    | 4                                              | 1                                                   | 8                                                      | 0                                  | 1                                                             | 3                                                       | 24                                                   |
| Damaio & Pinto, 2007       | 14                               | 0                                                                    | 8                                              | 4                                                   | 15                                                     | 0                                  | 1                                                             | 2                                                       | 44                                                   |
| Davidson et al., 2004      | 3                                | 5                                                                    | 12                                             | 5                                                   | 12                                                     | 6                                  | 1                                                             | 0                                                       | 44                                                   |
| Dickinson & O'Reilly, 2004 | 2                                | 9                                                                    | 30                                             | 6                                                   | 23                                                     | 2                                  | 5                                                             | 8                                                       | 85                                                   |
| Faro, 1999                 | 3                                | 0                                                                    | 4                                              | 0                                                   | 25                                                     | 0                                  | 6                                                             | 4                                                       | 42                                                   |
| Hanna & Guthrie, 2001      | 0                                | 8                                                                    | 2                                              | 0                                                   | 0                                                      | 0                                  | 0                                                             | 0                                                       | 10                                                   |
| Hanna & Guthrie, 2000      | 0                                | 1                                                                    | 2                                              | 5                                                   | 3                                                      | 3                                  | 0                                                             | 0                                                       | 14                                                   |
| Hermann, 2006              | 12                               | 9                                                                    | 24                                             | 4                                                   | 52                                                     | 6                                  | 6                                                             | 3                                                       | 116                                                  |
| Huus & Enskar, 2007        | 0                                | 5                                                                    | 6                                              | 1                                                   | 6                                                      | 1                                  | 2                                                             | 0                                                       | 21                                                   |
| Karlsson et al., 2008      | 2                                | 21                                                                   | 10                                             | 10                                                  | 12                                                     | 8                                  | 1                                                             | 0                                                       | 64                                                   |
| Kupper et al., 2018        | 0                                | 1                                                                    | 6                                              | 2                                                   | 7                                                      | 0                                  | 5                                                             | 0                                                       | 21                                                   |
| Kyngas & Barlow, 1995      | 5                                | 3                                                                    | 10                                             | 0                                                   | 18                                                     | 0                                  | 5                                                             | 12                                                      | 53                                                   |
| Kyngas & Hentinen, 1995    | 2                                | 7                                                                    | 10                                             | 5                                                   | 37                                                     | 3                                  | 2                                                             | 15                                                      | 81                                                   |
| Kyngas et al.,             | 2                                | 18                                                                   | 33                                             | 1                                                   | 7                                                      | 0                                  | 2                                                             | 0                                                       | 63                                                   |

| Analytic themes              | Negotiating independence         |                                                                      |                                                |                                                     | Feeling in control                                     |                                    |                                                               |                                                         | Total number of extracts coded for descriptive theme |
|------------------------------|----------------------------------|----------------------------------------------------------------------|------------------------------------------------|-----------------------------------------------------|--------------------------------------------------------|------------------------------------|---------------------------------------------------------------|---------------------------------------------------------|------------------------------------------------------|
|                              | Coming to terms with T1D<br>(32) | Parental roles and parent involvement in T1D self-management<br>(33) | Others' involvement in self-management<br>(40) | Becoming independent in T1D self-management<br>(31) | Structuring self-management into everyday life<br>(39) | Ability to self-manage T1D<br>(24) | Fitting in or standing out and self-management of T1D<br>(34) | Thinking about the future and T1D complications<br>(25) |                                                      |
| 1998                         |                                  |                                                                      |                                                |                                                     |                                                        |                                    |                                                               |                                                         |                                                      |
| Leach & Erickson, 1988       | 4                                | 1                                                                    | 3                                              | 0                                                   | 11                                                     | 1                                  | 1                                                             | 2                                                       | 23                                                   |
| Leonard et al., 2005         | 1                                | 44                                                                   | 14                                             | 2                                                   | 4                                                      | 0                                  | 0                                                             | 4                                                       | 69                                                   |
| Marshall et al., 2018        | 3                                | 0                                                                    | 9                                              | 0                                                   | 3                                                      | 0                                  | 3                                                             | 0                                                       | 18                                                   |
| Maslakpak et al., 2010       | 1                                | 4                                                                    | 24                                             | 1                                                   | 18                                                     | 0                                  | 1                                                             | 7                                                       | 56                                                   |
| Meldman 1987                 | 13                               | 2                                                                    | 15                                             | 3                                                   | 12                                                     | 3                                  | 1                                                             | 3                                                       | 52                                                   |
| Peters et al., 2014          | 2                                | 0                                                                    | 28                                             | 0                                                   | 3                                                      | 0                                  | 7                                                             | 0                                                       | 40                                                   |
| Rankin et al., 2018          | 0                                | 0                                                                    | 39                                             | 1                                                   | 10                                                     | 0                                  | 10                                                            | 0                                                       | 60                                                   |
| Ryninks et al., 2015         | 3                                | 2                                                                    | 12                                             | 0                                                   | 6                                                      | 1                                  | 1                                                             | 0                                                       | 25                                                   |
| Serlachius et al., 2012      | 0                                | 7                                                                    | 8                                              | 9                                                   | 16                                                     | 0                                  | 1                                                             | 6                                                       | 47                                                   |
| Standiford et al., 1997      | 1                                | 5                                                                    | 18                                             | 3                                                   | 5                                                      | 0                                  | 2                                                             | 2                                                       | 36                                                   |
| Sullivan-Bolyai et al., 2014 | 2                                | 15                                                                   | 15                                             | 4                                                   | 7                                                      | 1                                  | 0                                                             | 0                                                       | 44                                                   |
| Viklund & Wikblad, 2009      | 1                                | 26                                                                   | 3                                              | 21                                                  | 8                                                      | 4                                  | 0                                                             | 2                                                       | 65                                                   |
| Wang et al.,                 | 3                                | 5                                                                    | 15                                             | 4                                                   | 29                                                     | 2                                  | 10                                                            | 1                                                       | 69                                                   |



| Analytic themes                                                         | Negotiating independence |                                                              |                                        |                                             | Feeling in control                             |                            |                                                       |                                                 | Total number of extracts coded for descriptive theme |
|-------------------------------------------------------------------------|--------------------------|--------------------------------------------------------------|----------------------------------------|---------------------------------------------|------------------------------------------------|----------------------------|-------------------------------------------------------|-------------------------------------------------|------------------------------------------------------|
|                                                                         | Coming to terms with T1D | Parental roles and parent involvement in T1D self-management | Others' involvement in self-management | Becoming independent in T1D self-management | Structuring self-management into everyday life | Ability to self-manage T1D | Fitting in or standing out and self-management of T1D | Thinking about the future and T1D complications |                                                      |
| Descriptive themes (Number of articles descriptive theme is present in) | (32)                     | (33)                                                         | (40)                                   | (31)                                        | (39)                                           | (24)                       | (34)                                                  | (25)                                            |                                                      |
| 2013                                                                    |                          |                                                              |                                        |                                             |                                                |                            |                                                       |                                                 |                                                      |
| Wang et al., 2010                                                       | 1                        | 10                                                           | 17                                     | 5                                           | 8                                              | 2                          | 5                                                     | 0                                               | 48                                                   |
| Weinger et al., 2001                                                    | 0                        | 28                                                           | 6                                      | 0                                           | 6                                              | 0                          | 2                                                     | 2                                               | 44                                                   |
| Ye et al., 2017                                                         | 1                        | 0                                                            | 15                                     | 4                                           | 15                                             | 1                          | 4                                                     | 3                                               | 43                                                   |
| Total number of codes per descriptive theme                             | 203                      | 371                                                          | 571                                    | 197                                         | 644                                            | 101                        | 110                                                   | 110                                             |                                                      |
